# Supplementary material
Source: bioRxiv or medRxiv preprint supplement (https://medrxiv.org/highwire/filestream/89078/field_highwire_adjunct_files/2/2020.07.09.20150185-3.pdf)
Supplement: Supplementary file [file 2020.07.09.20150185-3.pdf]

**Prognostic Value of Long Noncoding RNA NORAD in Various cancers: a meta-analysis**

Qin Yang <sup>a, b, 1</sup>, Zheng Zhang <sup>c, 1</sup>, Yuan-Yuan Gong <sup>a, b, 1</sup>, Zhi-Ran Li <sup>a, b</sup>, Hua-Zhu

Zhang <sup>a, b</sup>, Gong-Hao He <sup>a, b, \*</sup>

<sup>a</sup> *Research Center of Clinical Pharmacology, Yunnan Provincial Hospital of Traditional Chinese Medicine, Kunming 650032, China.*

<sup>b</sup> *Department of Pharmacy, 920th Hospital of Joint Logistics Support Force, 212 Daguan Rd., Kunming 650032, China.*

<sup>c</sup> *Medical Engineering Section, The 306th Hospital of PLA, Beijing 100101, China.*

**Running title:** lncRNA NORAD with prognosis of cancer patients

---

<sup>1</sup> These authors contributed equally to this work.

\* Correspondence to: Gong-Hao He, Ph.D., 212 Daguan Rd, Kunming 650032, China.

Tel: +86-871-64774793, E-mail: gonghow@hotmail.com.

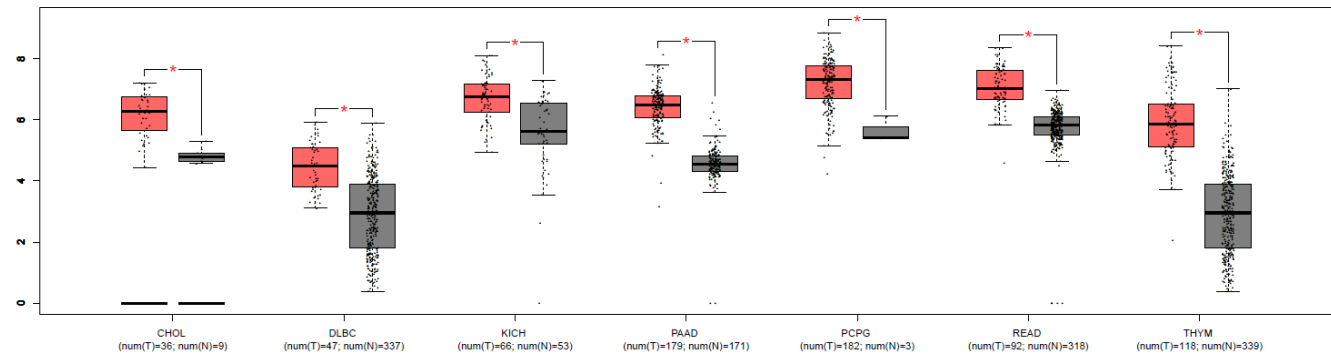

**Supplementary Figure S2.** The expression levels of NORAD in seven kinds of cancer tissues and normal tissues.

“\*” indicates a log<sub>2</sub>FC value > 1 and *P*-value < 0.01.

Abbreviations: CHOL: Cholangiocarcinoma; DLBC: Lymphoid neoplasm diffuse large b-cell lymphoma; KICH: Kidney Chromophobe; PAAD: Pancreatic adenocarcinoma; PCPG: Pheochromocytoma and Paraganglioma; PEAD: Rectum adenocarcinoma; THYM: Thymoma.
